# Supplementary material for: Fabrication of 5-R-isophthalic acid-modulated cadmium–organic coordination polymers and selectivity for the efficient detection of multiple analytes
Source: Royal Society of Chemistry journal article supplement (doi:10.1039/d3ce00899a), 2023-01-01
Supplement: d3ce00899a1.pdf [file d3ce00899a1.pdf]

Supplementary Material (ESI)

**Fabrication of 5-R-isophthalic acid-modulated a series of  
cadmium-organic coordination polymers and selectivity for the  
efficient detection of multiple analytes**

Wen-Ze Li,<sup>a</sup> Yu-Shu Sheng,<sup>a</sup> Xiao-Sa Zhang,<sup>a</sup> Yu Liu,<sup>a</sup> Jing Li,<sup>a</sup> and Jian Luan<sup>b\*</sup>

<sup>a</sup> College of Science, Shenyang University of Chemical Technology, Shenyang, 110142, P. R. China

<sup>b</sup> College of Sciences, Northeastern University, Shenyang, 110819, P. R. China

E-mail: [2010044@stu.neu.edu.cn](mailto:2010044@stu.neu.edu.cn) (J. Luan)

**Table S1** Crystallographic data for Cd-CP-1–4.

| Cd-CP                                                           | 1                                                                              | 2                                                                 | 3                                                                              | 4                                                                 |
|-----------------------------------------------------------------|--------------------------------------------------------------------------------|-------------------------------------------------------------------|--------------------------------------------------------------------------------|-------------------------------------------------------------------|
| Empirical formula                                               | C <sub>31</sub> H <sub>26</sub> Cd <sub>2</sub> N <sub>4</sub> O <sub>11</sub> | C <sub>15.5</sub> H <sub>18</sub> CdN <sub>2</sub> O <sub>8</sub> | C <sub>33</sub> H <sub>38</sub> Cd <sub>2</sub> N <sub>4</sub> O <sub>15</sub> | C <sub>23</sub> H <sub>23</sub> CdN <sub>4</sub> O <sub>8.5</sub> |
| Formula weight                                                  | 855.395                                                                        | 472.736                                                           | 955.511                                                                        | 603.872                                                           |
| Crystal system                                                  | Monoclinic                                                                     | Monoclinic                                                        | Triclinic                                                                      | Monoclinic                                                        |
| Space group                                                     | <i>P2/c</i>                                                                    | <i>C2/c</i>                                                       | <i>P-1</i>                                                                     | <i>C2/c</i>                                                       |
| <i>a</i> (Å)                                                    | 10.3061(1)                                                                     | 11.0328(1)                                                        | 10.0583(2)                                                                     | 27.3243(2)                                                        |
| <i>b</i> (Å)                                                    | 8.9312(1)                                                                      | 17.1307(2)                                                        | 10.1823(2)                                                                     | 10.2895(1)                                                        |
| <i>c</i> (Å)                                                    | 16.6010(3)                                                                     | 19.2872(2)                                                        | 20.6673(3)                                                                     | 17.8117(2)                                                        |
| $\alpha$ (°)                                                    | 90                                                                             | 90                                                                | 97.263(2)                                                                      | 90                                                                |
| $\beta$ (°)                                                     | 95.428(1)                                                                      | 93.281(1)                                                         | 94.133(1)                                                                      | 105.530(1)                                                        |
| $\gamma$ (°)                                                    | 90                                                                             | 90                                                                | 119.439(2)                                                                     | 90                                                                |
| <i>V</i> (Å <sup>3</sup> )                                      | 1521.20(4)                                                                     | 3639.30(7)                                                        | 1806.38(7)                                                                     | 4824.99(8)                                                        |
| <i>Z</i>                                                        | 2                                                                              | 8                                                                 | 2                                                                              | 8                                                                 |
| <i>D<sub>c</sub></i> (g cm <sup>-3</sup> )                      | 1.867                                                                          | 1.726                                                             | 1.757                                                                          | 1.663                                                             |
| <i>R</i> <sub>int</sub>                                         | 0.0191                                                                         | 0.0232                                                            | 0.0379                                                                         | 0.0160                                                            |
| GOF                                                             | 1.0483                                                                         | 1.0708                                                            | 1.0450                                                                         | 0.9176                                                            |
| <i>R</i> <sub>1</sub> <sup>a</sup> [ <i>I</i> > 2σ( <i>I</i> )] | 0.0234                                                                         | 0.0234                                                            | 0.0330                                                                         | 0.0576                                                            |
| <i>wR</i> <sub>2</sub> <sup>b</sup> (all data)                  | 0.0613                                                                         | 0.0637                                                            | 0.0924                                                                         | 0.1449                                                            |

$$^a R_1 = \Sigma||F_o| - |F_c|| / \Sigma|F_o|, \quad ^b wR_2 = \Sigma[w(F_o^2 - F_c^2)^2] / \Sigma[w(F_o^2)^2]^{1/2}.$$

## Supplementary Material (ESI)

**Table S2** Selected bond distances (Å) and angles (°) for Cd-CP-1.

|                     |            |                     |            |
|---------------------|------------|---------------------|------------|
| Cd(1)–O(3)#1        | 2.1960(17) | Cd(1)–O(4)#2        | 2.2227(18) |
| Cd(1)–O(1)          | 2.3069(19) | Cd(1)–N(1)          | 2.368(2)   |
| Cd(1)–O(2)          | 2.4157(19) | Cd(1)–O(5)#3        | 2.4512(18) |
| O(3)#1–Cd(1)–O(4)#2 | 124.22(7)  | O(1)–Cd(1)–O(2)     | 55.29(7)   |
| O(3)#1–Cd(1)–O(1)   | 95.88(7)   | N(1)–Cd(1)–O(2)     | 86.76(8)   |
| O(4)#2–Cd(1)–O(1)   | 137.86(7)  | O(3)#1–Cd(1)–O(5)#3 | 92.26(7)   |
| O(3)#1–Cd(1)–N(1)   | 90.04(8)   | O(4)#2–Cd(1)–O(5)#3 | 80.61(7)   |
| O(4)#2–Cd(1)–N(1)   | 89.74(8)   | O(1)–Cd(1)–O(5)#3   | 85.91(8)   |
| O(1)–Cd(1)–N(1)     | 103.91(8)  | N(1)–Cd(1)–O(5)#3   | 169.63(8)  |
| O(3)#1–Cd(1)–O(2)   | 148.94(7)  | O(2)–Cd(1)–O(5)#3   | 96.39(7)   |
| O(4)#2–Cd(1)–O(2)   | 86.68(7)   |                     |            |

Symmetry codes: #1  $x + 1, y, z$ ; #2  $-x, y, -z + 1/2$ ; #3  $x, y - 1, z$ .

**Table S3** Selected bond distances (Å) and angles (°) for Cd-CP-2.

|                    |           |                     |           |
|--------------------|-----------|---------------------|-----------|
| Cd(1)–O(1W)        | 2.285(2)  | Cd(1)–N(1)          | 2.327(3)  |
| Cd(1)–O(2W)        | 2.330(2)  | Cd(1)–O(4)#1        | 2.331(2)  |
| Cd(1)–O(1)         | 2.344(2)  | Cd(1)–O(2)          | 2.535(2)  |
| Cd(1)–O(3)#1       | 2.561(2)  | O(1W)–Cd(1)–O(2)    | 83.89(8)  |
| O(1W)–Cd(1)–N(1)   | 93.88(10) | N(1)–Cd(1)–O(2)     | 88.09(8)  |
| O(1W)–Cd(1)–O(2W)  | 178.90(8) | O(2W)–Cd(1)–O(2)    | 96.90(8)  |
| N(1)–Cd(1)–O(2W)   | 86.92(10) | O(4)#1–Cd(1)–O(2)   | 133.09(7) |
| O(1W)–Cd(1)–O(4)#1 | 88.44(8)  | O(1)–Cd(1)–O(2)     | 52.91(7)  |
| N(1)–Cd(1)–O(4)#1  | 138.67(8) | O(1W)–Cd(1)–O(3)#1  | 95.40(8)  |
| O(2W)–Cd(1)–O(4)#1 | 90.46(8)  | N(1)–Cd(1)–O(3)#1   | 86.04(8)  |
| O(1W)–Cd(1)–O(1)   | 93.51(8)  | O(2W)–Cd(1)–O(3)#1  | 83.90(8)  |
| N(1)–Cd(1)–O(1)    | 139.12(9) | O(4)#1–Cd(1)–O(3)#1 | 52.70(7)  |
| O(2W)–Cd(1)–O(1)   | 86.37(8)  | O(1)–Cd(1)–O(3)#1   | 133.05(7) |
| O(4)#1–Cd(1)–O(1)  | 81.66(7)  | O(2)–Cd(1)–O(3)#1   | 174.03(7) |

## Supplementary Material (ESI)

Symmetry code: #1  $x - 1/2, y + 1/2, z$ .

**Table S4** Selected bond distances (Å) and angles (°) for Cd-CP-3.

|                    |           |                    |            |
|--------------------|-----------|--------------------|------------|
| Cd(1)–O(4)#1       | 2.205(2)  | Cd(2)–O(6)         | 2.247(2)   |
| Cd(1)–N(1)         | 2.291(3)  | Cd(2)–N(2)         | 2.252(3)   |
| Cd(1)–O(2)         | 2.294(2)  | Cd(2)–O(7)         | 2.328(3)   |
| Cd(1)–O(1W)        | 2.325(2)  | Cd(2)–O(3W)        | 2.364(3)   |
| Cd(1)–O(2W)        | 2.427(2)  | Cd(2)–O(8)         | 2.380(2)   |
| Cd(1)–O(1)         | 2.500(2)  | Cd(2)–O(6)#2       | 2.528(2)   |
| O(4)#1–Cd(1)–N(1)  | 135.89(9) | O(6)–Cd(2)–N(2)    | 121.41(10) |
| O(4)#1–Cd(1)–O(2)  | 136.64(9) | O(6)–Cd(2)–O(7)    | 85.79(9)   |
| N(1)–Cd(1)–O(2)    | 87.20(9)  | N(2)–Cd(2)–O(7)    | 143.22(10) |
| O(4)#1–Cd(1)–O(1W) | 96.28(9)  | O(6)–Cd(2)–O(3W)   | 109.83(10) |
| N(1)–Cd(1)–O(1W)   | 85.60(9)  | N(2)–Cd(2)–O(3W)   | 91.31(10)  |
| O(2)–Cd(1)–O(1W)   | 90.79(10) | O(7)–Cd(2)–O(3W)   | 102.65(11) |
| O(4)#1–Cd(1)–O(2W) | 88.15(9)  | O(6)–Cd(2)–O(8)    | 140.73(8)  |
| N(1)–Cd(1)–O(2W)   | 84.06(9)  | N(2)–Cd(2)–O(8)    | 92.61(9)   |
| O(2)–Cd(1)–O(2W)   | 93.05(10) | O(7)–Cd(2)–O(8)    | 55.31(8)   |
| O(1W)–Cd(1)–O(2W)  | 168.78(8) | O(3W)–Cd(2)–O(8)   | 86.28(9)   |
| O(4)#1–Cd(1)–O(1)  | 82.84(8)  | O(6)–Cd(2)–O(6)#2  | 77.98(9)   |
| N(1)–Cd(1)–O(1)    | 139.96(8) | N(2)–Cd(2)–O(6)#2  | 80.11(9)   |
| O(2)–Cd(1)–O(1)    | 53.90(8)  | O(7)–Cd(2)–O(6)#2  | 82.56(9)   |
| O(1W)–Cd(1)–O(1)   | 102.24(8) | O(3W)–Cd(2)–O(6)#2 | 170.72(9)  |
| O(2W)–Cd(1)–O(1)   | 88.51(8)  | O(8)–Cd(2)–O(6)#2  | 90.55(8)   |

Symmetry codes: #1  $x, y + 1, z$ ; #2  $-x + 1, -y, -z + 1$ .

## Supplementary Material (ESI)

**Table S5** Selected bond distances (Å) and angles (°) for Cd-CP-4.

|                     |          |                   |          |
|---------------------|----------|-------------------|----------|
| Cd(1)–O(3)#1        | 2.264(7) | Cd(1)–O(4)#2      | 2.322(8) |
| Cd(1)–N(2)          | 2.326(9) | Cd(1)–N(1)        | 2.334(9) |
| Cd(1)–O(1)          | 2.356(7) | Cd(1)–O(2)        | 2.387(9) |
| O(3)#1–Cd(1)–O(4)#2 | 132.9(3) | N(2)–Cd(1)–O(1)   | 86.9(3)  |
| O(3)#1–Cd(1)–N(2)   | 89.0(3)  | N(1)–Cd(1)–O(1)   | 99.4(3)  |
| O(4)#2–Cd(1)–N(2)   | 88.8(3)  | O(3)#1–Cd(1)–O(2) | 88.8(3)  |
| O(3)#1–Cd(1)–N(1)   | 87.3(3)  | O(4)#2–Cd(1)–O(2) | 138.3(3) |
| O(4)#2–Cd(1)–N(1)   | 89.6(3)  | N(2)–Cd(1)–O(2)   | 94.5(4)  |
| N(2)–Cd(1)–N(1)     | 173.3(3) | N(1)–Cd(1)–O(2)   | 91.0(4)  |
| O(3)#1–Cd(1)–O(1)   | 142.5(2) | O(1)–Cd(1)–O(2)   | 54.5(3)  |
| O(4)#2–Cd(1)–O(1)   | 84.3(3)  |                   |          |

Symmetry codes: #1  $x, y + 1, z$ ; #2  $-x, -y + 1, -z$ .

**Table S6**  $K_{sv}$  values and LOD of Cd-CP-1–4 for different analytes.

| Analyte                       | Cd-CP-1                     |                       | Cd-CP-2                     |                       | Cd-CP-3                     |                       | Cd-CP-4                     |                       |
|-------------------------------|-----------------------------|-----------------------|-----------------------------|-----------------------|-----------------------------|-----------------------|-----------------------------|-----------------------|
|                               | $K_{sv}$ (M <sup>-1</sup> ) | LOD (M)               |
| Fe <sup>3+</sup>              | $3.18 \times 10^3$          | $1.42 \times 10^{-5}$ | $3.36 \times 10^4$          | $1.13 \times 10^{-6}$ | $4.80 \times 10^3$          | $9.38 \times 10^{-6}$ | $8.68 \times 10^4$          | $5.18 \times 10^{-7}$ |
| MnO <sub>4</sub> <sup>-</sup> | $1.34 \times 10^5$          | $3.37 \times 10^{-7}$ | $1.58 \times 10^4$          | $2.39 \times 10^{-6}$ | $1.70 \times 10^4$          | $2.65 \times 10^{-6}$ | $1.58 \times 10^5$          | $2.86 \times 10^{-7}$ |
| NB                            | $1.85 \times 10^3$          | $2.44 \times 10^{-5}$ | $2.53 \times 10^4$          | $1.49 \times 10^{-6}$ | $7.36 \times 10^3$          | $6.11 \times 10^{-6}$ | $1.20 \times 10^5$          | $3.75 \times 10^{-7}$ |

## Supplementary Material (ESI)

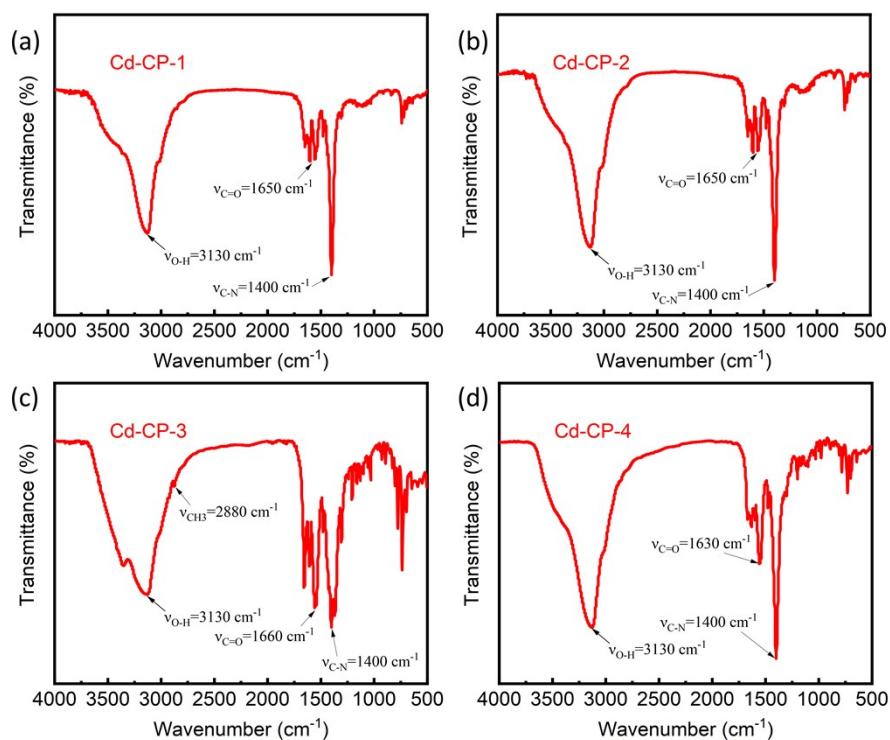

Fig. S1 The IR spectra of Cd-CP-1–4.

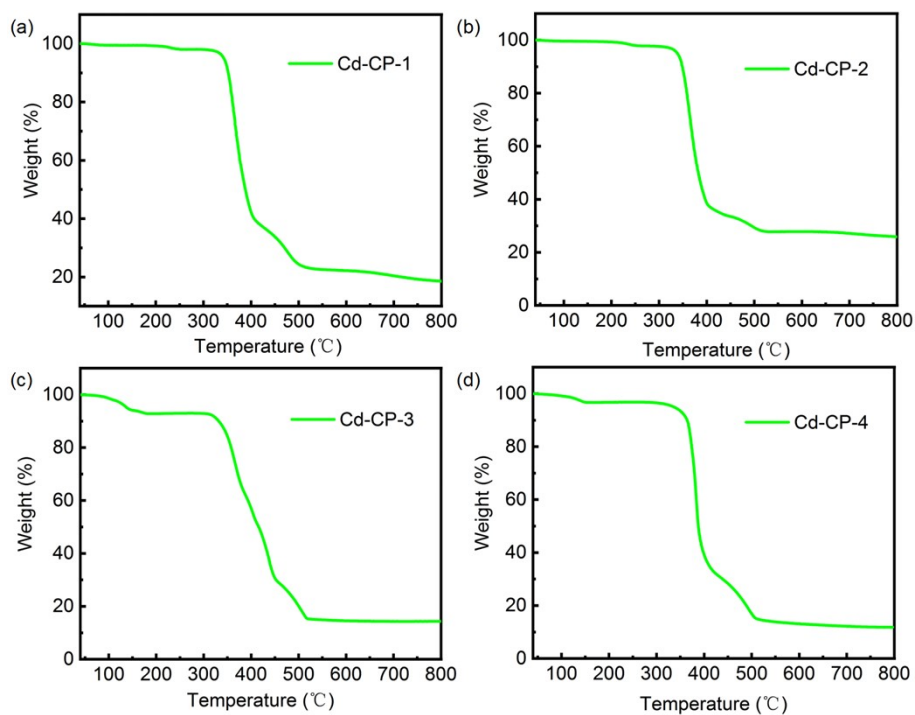

Fig. S2 The TG curves of Cd-CP-1–4.

## Supplementary Material (ESI)

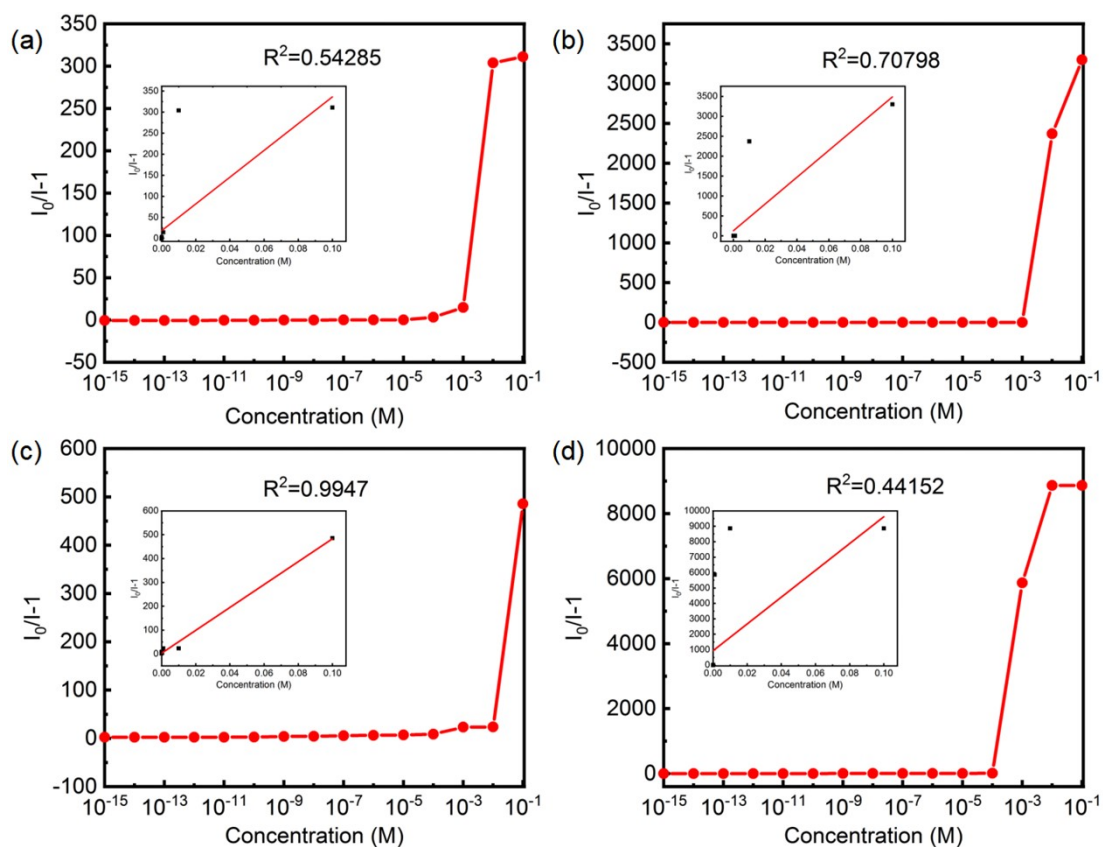

**Fig. S3**  $K_{sv}$  plots of Cd-CP-1 (a), 2 (b), 3 (c) and 4 (d) for sensing of  $Fe^{3+}$  ion.

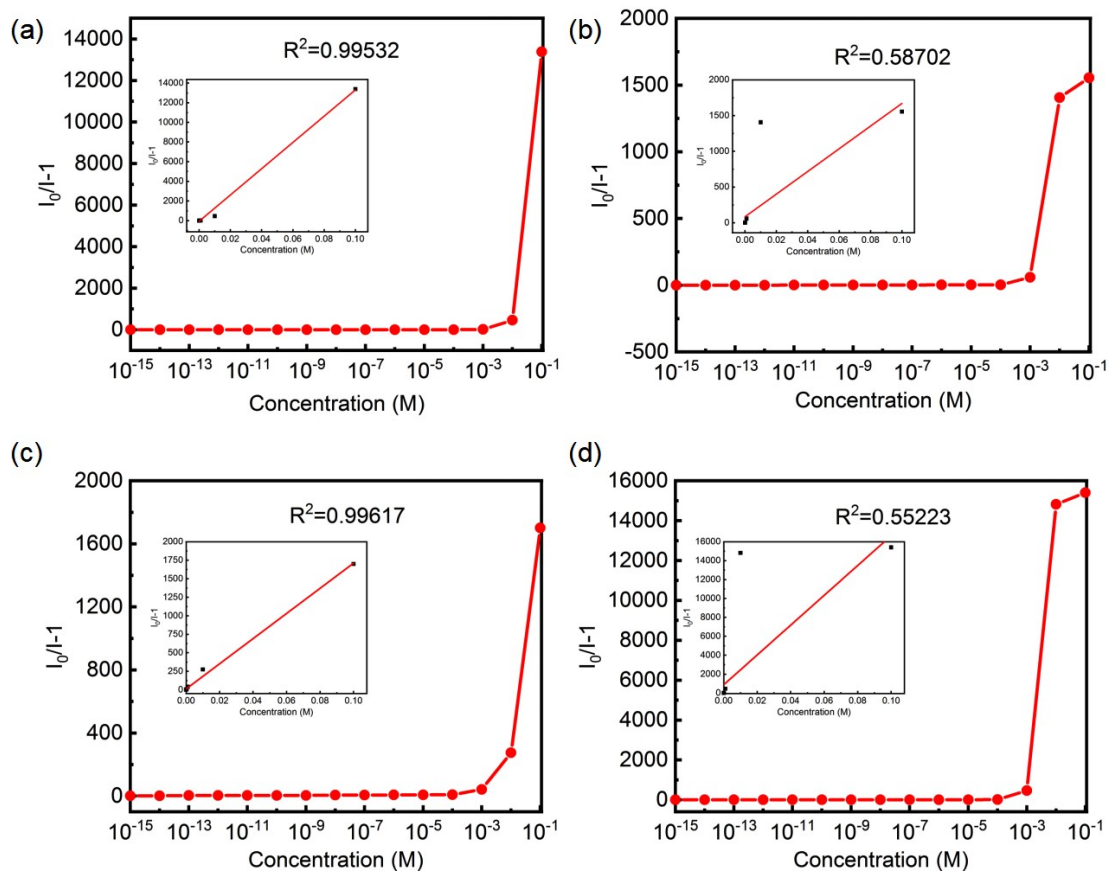

**Fig. S4**  $K_{sv}$  plots of Cd-CP-1 (a), 2 (b), 3 (c) and 4 (d) for sensing of  $MnO_4^-$  ion.

## Supplementary Material (ESI)

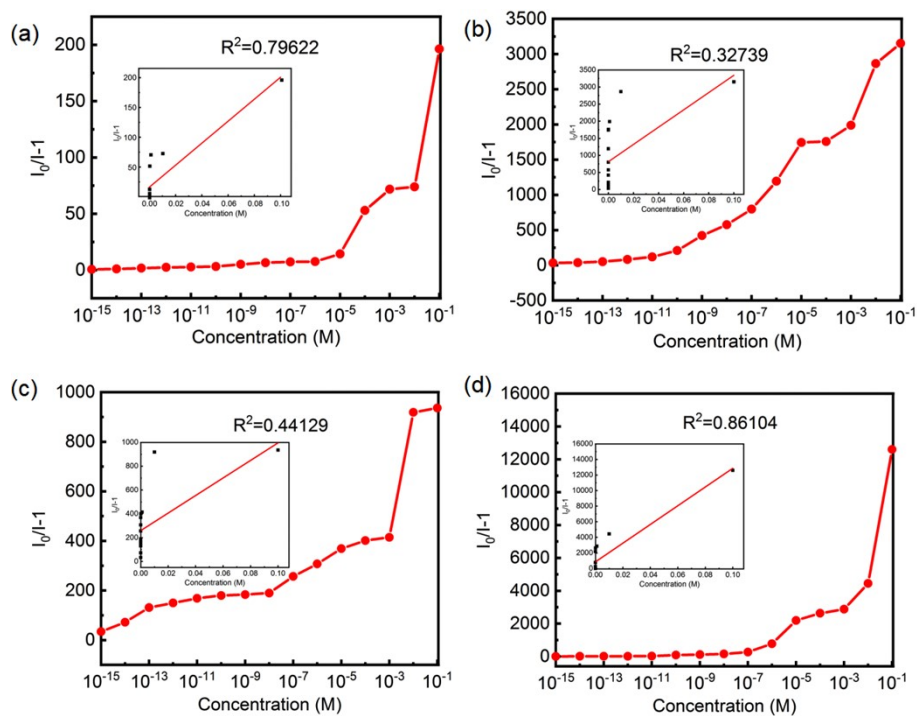

**Fig. S5**  $K_{sv}$  plots of Cd-CP-1 (a), 2 (b), 3 (c) and 4 (d) for sensing of NB.

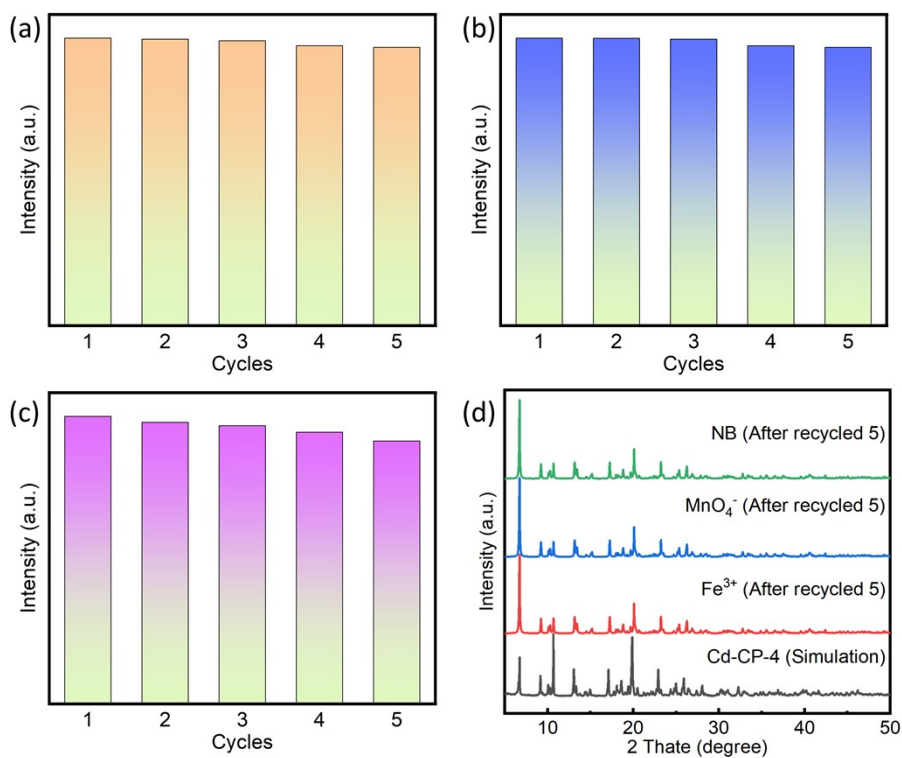

**Fig. S6** The cyclic response of the fluorescence intensities of Cd-CP-4 for detecting  $Fe^{3+}$  (a),  $MnO_4^-$  (b) and NB (c). The PXRD patterns of Cd-CP-4 treated by  $Fe^{3+}$  (a),  $MnO_4^-$  (b) and NB before and after five cycles.

## Supplementary Material (ESI)

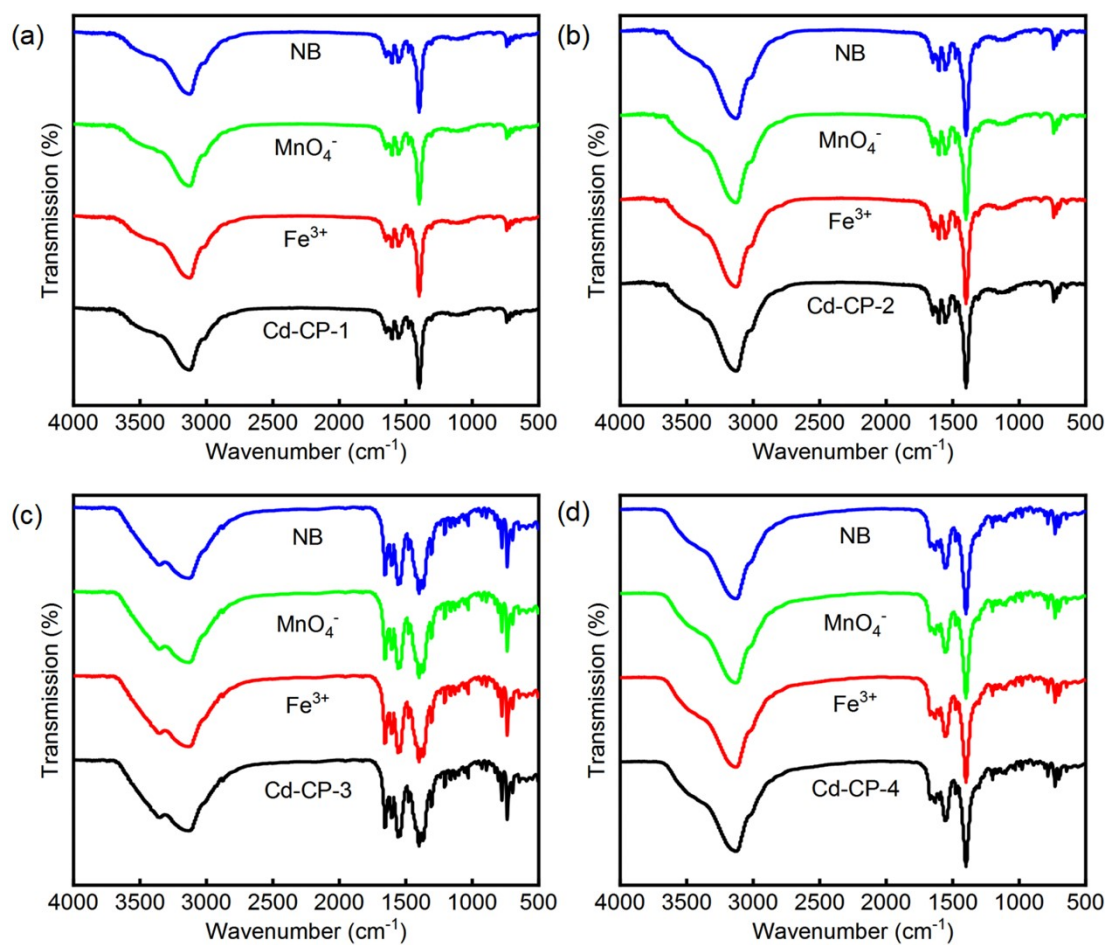

**Fig. S7** The IR spectra of Cd-CP-1–4 before and after being soaked in different analyzes.
